# Supplementary material
Source: MDPI journal article supplement (https://www.mdpi.com/2071-1050/15/1/825)
Supplement: s1 [file s1]

Dear Respondent,

### REQUEST FOR RESPONSE TO QUESTIONNAIRE

I am a lecture in the Federal University of Technology, Akure. I am conducting a research on “**the application of Radio Frequency Identification (RFID) Technology to the construction industry in Lagos state, Nigeria**”. This research work is not intending to paint any professions black and information given would be made confidential. Thanks for your anticipated corporation.

Kindly tick [ ] where appropriate and make comments where necessary;

### SECTION A: GENERAL INFORMATION

1. Profession of respondent: (a) Quantity Surveyor [ ] (b) Architect [ ] (c) Project manager [ ] (d) Engineer [ ] (e) Builder [ ]
2. What is your academic qualification: (a) HND [ ] (b) PGD [ ] (c) B.Tech/B.sc [ ] (d) Ph.D. [ ] (e) M.Tech/M.Sc. [ ]
3. Years of experience: (a) 1-5yrs [ ] (b) 6-10yrs [ ] (c) 11-15yrs [ ] (d) 16-20yrs [ ] (e) above 20 [ ]
4. Professional qualification: (a) MNIA/ARCON [ ] (b) MNIQS/QSBRN [ ] (c) MNIOB/CORON [ ] (d) NSE/COREN [ ] (e) PMI/PMB [ ]
5. Number of construction projects you have participated in as a professional: (a) 1-5 [ ] (b) 6-10 [ ] (c) 11-15 [ ] (d) 16-20 [ ] (e) above 20 [ ]

### SECTION B: Barriers in the implementation of RFID

What is the level of importance of the following barriers of RFID in the construction industry?

(5= very high, 4=high, 3=average, 2=very low, 1=low)

| S/N | Variables                                  | 5 | 4 | 3 | 2 | 1 |
|-----|--------------------------------------------|---|---|---|---|---|
| 1   | High cost                                  |   |   |   |   |   |
| 2   | Security                                   |   |   |   |   |   |
| 3   | Lack of industry standard                  |   |   |   |   |   |
| 4   | Lack of maturity                           |   |   |   |   |   |
| 5   | Privacy                                    |   |   |   |   |   |
| 6   | Low technical ability                      |   |   |   |   |   |
| 7   | Power availability                         |   |   |   |   |   |
| 8   | Inadequate training                        |   |   |   |   |   |
| 9   | Lack of knowledge about the technology     |   |   |   |   |   |
| 10  | Time frame to develop the technology       |   |   |   |   |   |
| 11  | Low investment                             |   |   |   |   |   |
| 12  | Commitment from other project participants |   |   |   |   |   |
| 13  | Maintenance                                |   |   |   |   |   |
| 14  | Lack of demand                             |   |   |   |   |   |
| 15  | Human issues                               |   |   |   |   |   |
| 16  | Unclear needs                              |   |   |   |   |   |
| 17  | Lack of communication in remote areas      |   |   |   |   |   |
| 18  | Virus threats                              |   |   |   |   |   |
| 19  | Inefficient use of software                |   |   |   |   |   |

|    |                                     |  |  |  |  |  |
|----|-------------------------------------|--|--|--|--|--|
| 20 | Low infrastructure                  |  |  |  |  |  |
| 21 | Immaturity                          |  |  |  |  |  |
| 22 | Complexity                          |  |  |  |  |  |
| 23 | Difficulty in changing the software |  |  |  |  |  |
